# Supplementary material for: Large Subunit of the Human Herpes Simplex Virus Terminase as a Promising Target in Design of Anti-Herpesvirus Agents
Source: MDPI journal article supplement (doi:10.3390/molecules28217375), 2023-10-31
Supplement: s1 [file s1]

# Supplementary Materials

## Large Subunit of the Human Herpes Simplex Virus Terminase as a Promising Target in Design of Anti-Herpesvirus Agents

Victor P. Krasnov <sup>1,\*</sup>, Valeriya L. Andronova <sup>2</sup>, Alexander V. Belyavsky <sup>3</sup>, Sophia S. Borisevich <sup>4</sup>, George A. Galegov <sup>2</sup>, Oleg F. Kandarakov <sup>3</sup>, Dmitry A. Gruzdev <sup>1</sup>, Olga A. Vozdvizhenskaya <sup>1</sup>, Galina L. Levit <sup>1</sup>

<sup>1</sup> Postovsky Institute of Organic Synthesis, Russian Academy of Sciences (Ural Branch), Ekaterinburg 620108, Russia

<sup>2</sup> Gamaleya National Research Center for Epidemiology and Microbiology, Ministry of Health of the Russian Federation, Moscow 123098, Russia

<sup>3</sup> Engelhardt Institute of Molecular Biology, Russian Academy of Sciences, Moscow 119991, Russia

<sup>4</sup> Ufa Institute of Chemistry, Russian Academy of Sciences, Ufa 450078, Russia

### Table of Contents

|                                                                          |    |
|--------------------------------------------------------------------------|----|
| <b>Table S1.</b> Molecular docking results .....                         | S2 |
| <b>Figure S1.</b> Molecular re-docking procedure .....                   | S3 |
| <b>Figure S2.</b> Protein–ligand root-mean-square deviation (RMSD) ..... | S4 |
| <b>Figure S3.</b> Protein root-mean-square fluctuations (RMSF) .....     | S5 |
| <b>Figures S4–S7.</b> Protein–ligand contacts .....                      | S6 |

## Molecular Docking

**Table S1.** Molecular docking results

| Site            | ID complex | Pose | Docking score              | E-model | IFD score                     | $\Delta G_{\text{MM-BSGA}}$ (kcal/mol) | H-bond                               | Other interactions                           | Clash                        |
|-----------------|------------|------|----------------------------|---------|-------------------------------|----------------------------------------|--------------------------------------|----------------------------------------------|------------------------------|
| ATP domain      | 1-ATP-D    | 5    | -8.9<br>( $\Delta = 2.7$ ) | -91.04  | -2739.8<br>( $\Delta = 3.3$ ) | -61.1                                  | R260<br>R261<br>G263<br>K264<br>S385 | W266 - $\pi$ - $\pi$<br>H194 - $\pi$ - $\pi$ | None                         |
| Central channel | 1-CC       | 9    | -3.3<br>( $\Delta = 1.0$ ) | -36.71  | -2732.7<br>( $\Delta = 3.2$ ) | -32.8                                  | H316                                 | H316 - $\pi$ - $\pi$                         | H316<br>D315                 |
| Loop 339-350    | 1-loop1    | 5    | -8.3                       | -79.4   | -2737.8                       | -56.3                                  | G347                                 | F350 - $\pi$ - $\pi$                         | I345                         |
|                 | 1-loop2    | 6    | -7.7                       | -65.0   | -2741.4                       | -58.2                                  | E367<br>H340<br>N341<br>E320         | none                                         | T368<br>T333<br>T321<br>none |

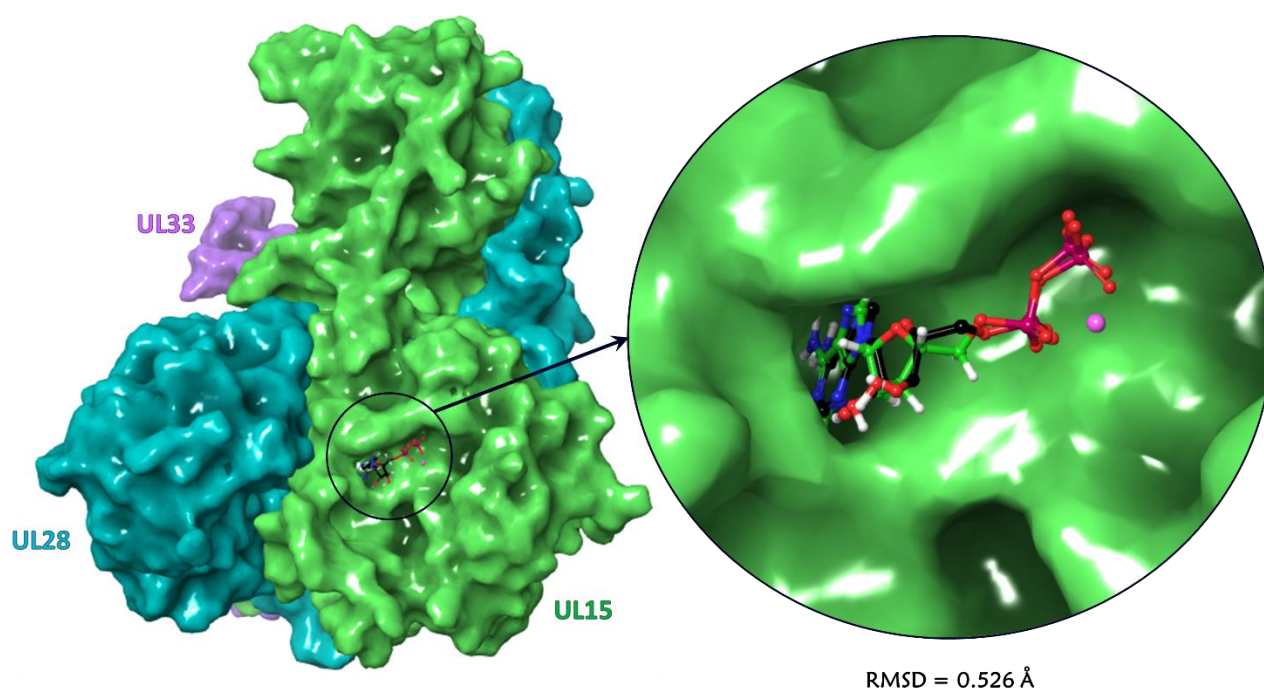

**Figure S1.** Molecular re-docking procedure. The green molecule corresponds to the geometric parameters obtained as a result of molecular docking. The black molecule corresponds to PDB code 6M5V.

## Molecular Dynamics

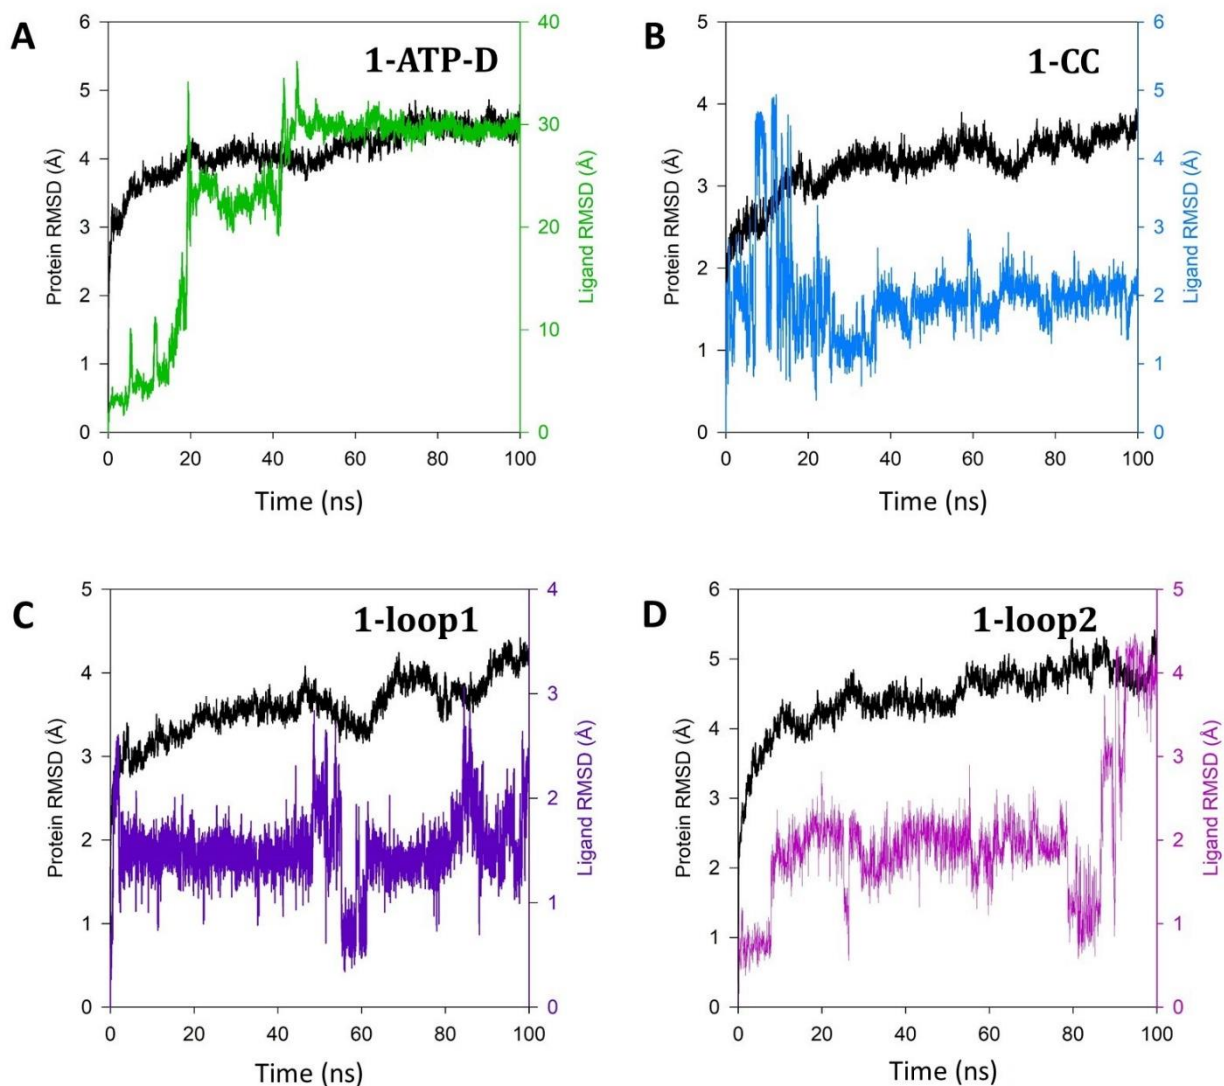

**Figure S2.** Protein–ligand root-mean-square deviation (RMSD): **A**, RMSD of the ligand and protein atoms in **1-ATP-D** complex; **B**, RMSD the ligand and protein atoms in **1-CC** complex; **C**, RMSD of the ligand and protein atoms in **1-loop1** complex; **D**, RMSD of the ligand and protein atoms in **1-loop2** complex.

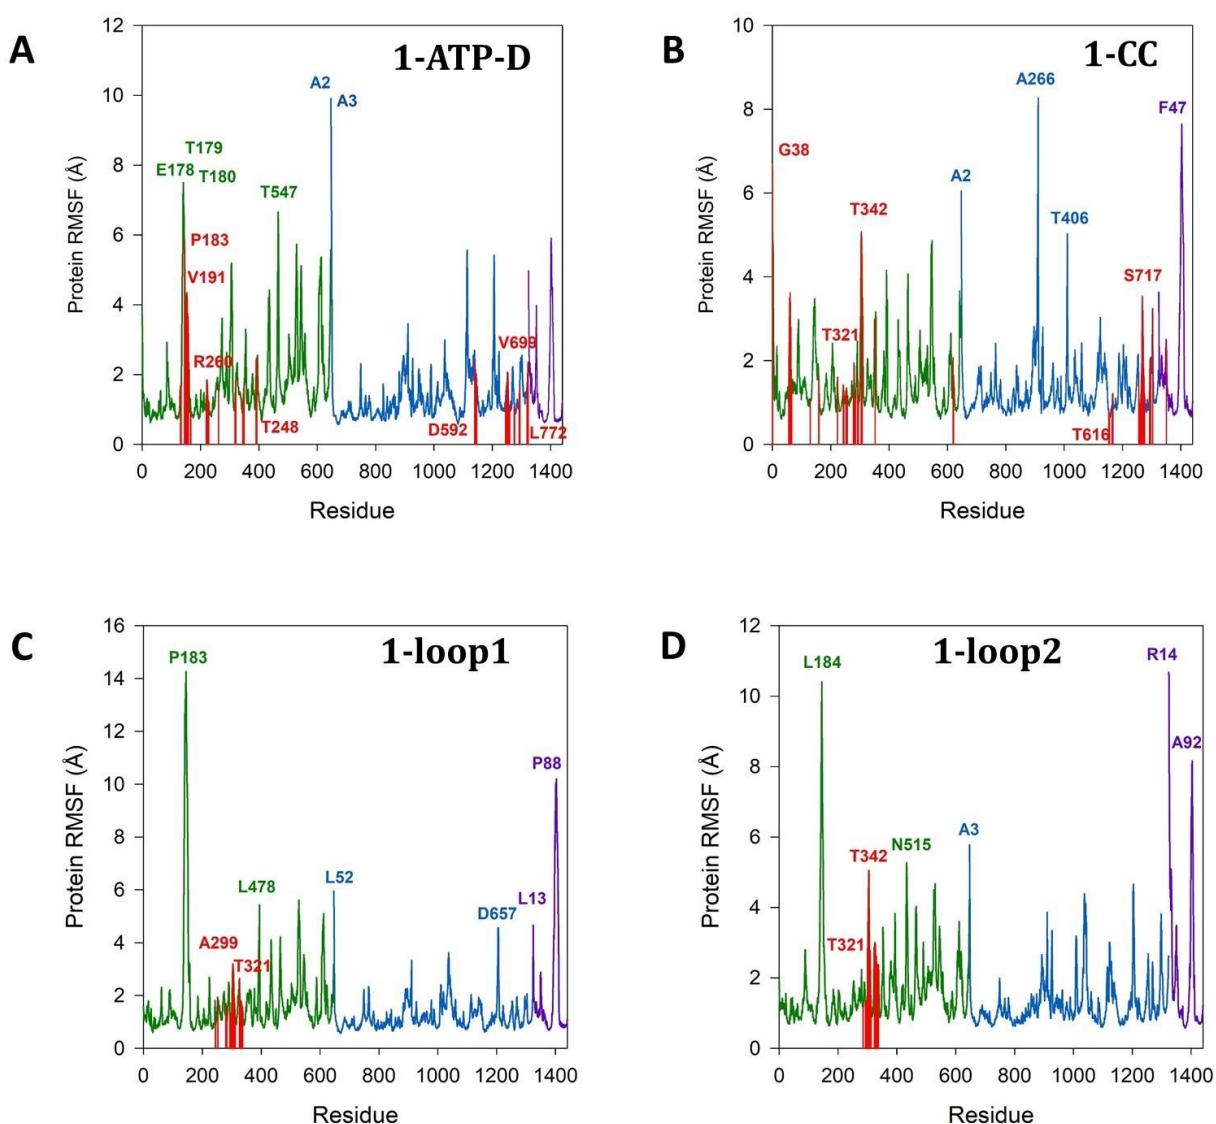

**Figure S3.** Protein root-mean-square fluctuations (RMSF): **A**, RMSF of the ligand and protein atoms in **1-ATP-D** complex; **B**, RMSF of the ligand and protein atoms in **1-CC** complex; **C**, RMSF of the ligand and protein atoms in **1-loop1** complex; **D**, RMSF of the ligand and protein atoms in **1-loop2** complex. Green plot corresponds to subunit UL15; blue, UL28; violet, UL33. Peaks indicate areas of the protein that fluctuate the most during the simulation. Protein residues that interact with the ligand are marked with red-colored vertical bars.



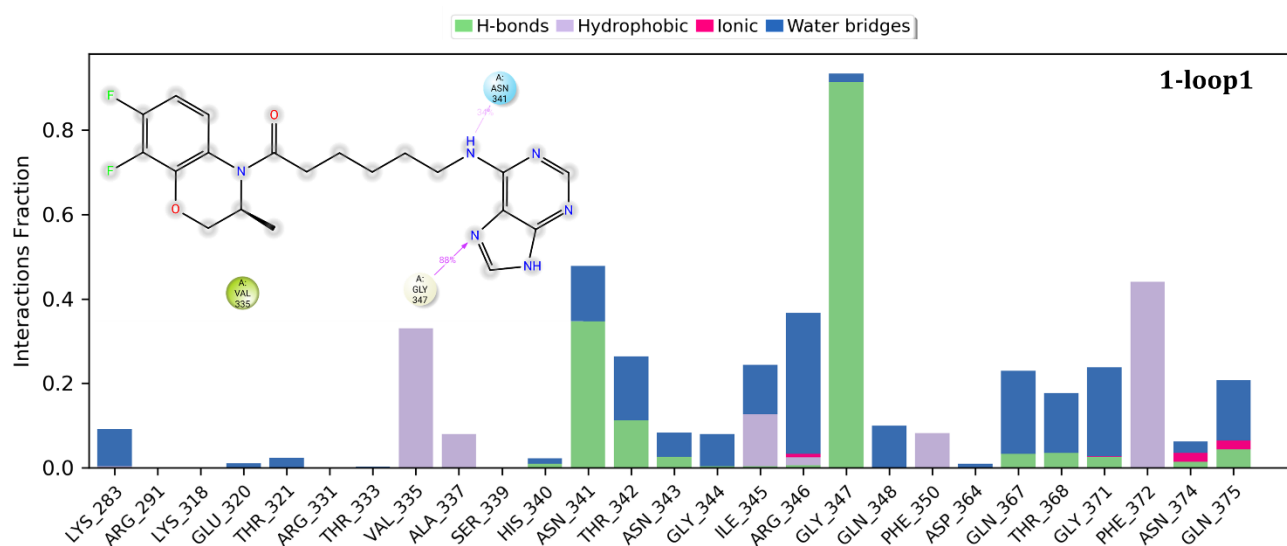

**Figure S6.** Protein–ligand contacts between atoms of ligand and protein in **1-loop1** complex.

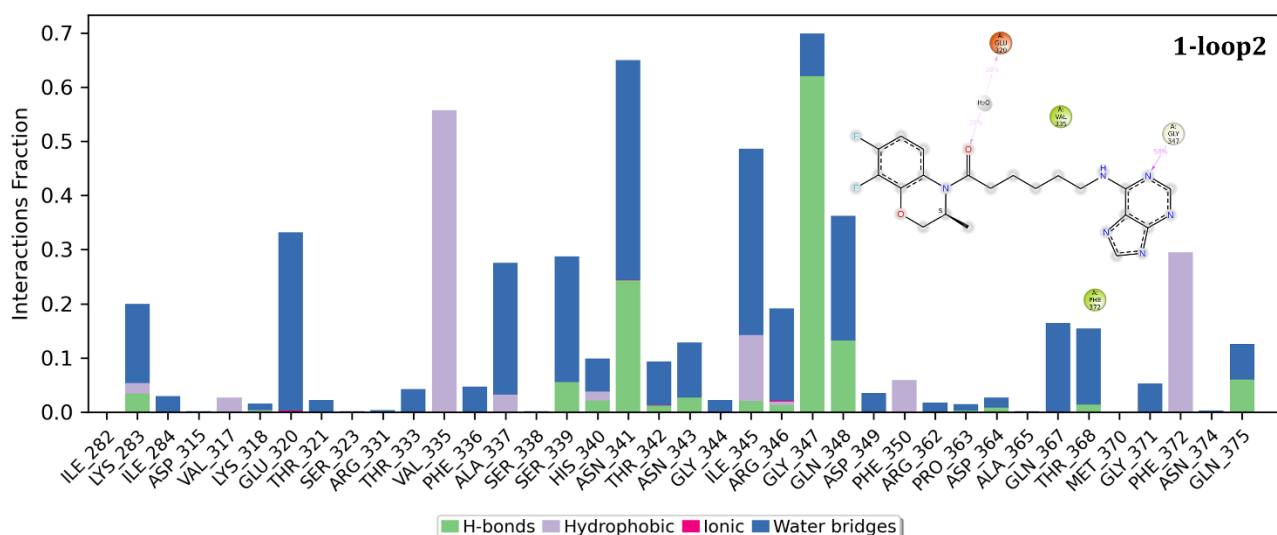

**Figure S7.** Protein–ligand contacts between atoms of ligand and protein in **1-loop2** complex.
